# Supplementary material
Source: MDPI journal article supplement (https://www.mdpi.com/2227-9709/8/1/9)
Supplement: s1 [file s1]

# CD003590.pub5 RU

# 53891  
Name CD003590.pub5 RU  
Created by test.translation.proxy  
Created 18 Jan 15:39  
Status New

Dashboard 1 ISSUES

Jobs Translation New

|                                     |   |           |                  |
|-------------------------------------|---|-----------|------------------|
| <input checked="" type="checkbox"/> | # | Confirmed | File             |
| <input checked="" type="checkbox"/> | 1 | 0%        | CD003590.pub5 RU |

Analyses

Quotes New

## Pre-translate

### Translation memory

☒ Pre-translate from translation memory

Pre-translation threshold 100 %

### Non-Translatables

☒ Pre-translate non-translatables

### Machine translation

☒ Pre-translate from machine translation

### Overwrite

☐ Overwrite existing translations in target segments

### Set segment status to confirmed for

☒ 101% translation memory matches

☐ 100% translation memory matches

☐ 100% non-translatable matches

☐ 100% machine translation matches

### Pre-translate & set job to completed

☐ Set job to completed once pre-translated

☐ Set job to completed once pre-translated and all segments are confirmed

☐ Set project to completed once all jobs pre-translated

### Lock

☐ 101% translation memory matches

☐ 100% translation memory matches

☐ 100% non-translatable matches

☐ 100% machine translation matches

Pre-translate

Edit

Save as

Delete
