# Supplementary material
Source: MDPI journal article supplement (https://www.mdpi.com/2227-9709/8/1/9)
Supplement: s1 [file s1]

# CD003590.pub5 RU

# 53891

Name CD003590.pub5 RU

Created by test.translation.proxy

Created 18 Jan 15:39

Status New

Source language EN<sup>US</sup>

Target languages RU

Machine translation engine Memsources Translate

Owner test.translation.proxy

Business

Edit

Save as

Delete

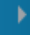

Dashboard

1 ISSUES

OVERALL

Jobs

Translation

New

Edit

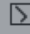

#

Confirmed

File

1

0%

CD003590.pub5

Analyses

Quotes

New

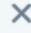

Analyze

Type

Default

Name

Analysis #{innerid}

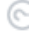

☒ Include translation memory matches

☒ Include internal fuzzies

☐ Include non-translatables

☒ Include machine translation matches

☐ Exclude confirmed segments

☐ Exclude locked segments

☐ Exclude numbers

☐ Analyze by provider

☐ Analyze by language

Count units of the

☒ source

☐ target

Analyze
