# Supplementary material
Source: MDPI journal article supplement (https://www.mdpi.com/2227-9709/8/1/9)
Supplement: s1 [file s1]

# CD003590.pub5 RU

# 53891

Name CD003590.pub5 RU

Created by testtranslation.proxy

Created 18 Jan 15:39

Status New

Source language

EN<sup>US</sup>

Target languages

RU

Machine translation engine Memsource Translate

Owner test.translation.proxy

Business unit TEST Russian

Edit

Save as

Delete

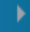

## Dashboard

1 ISSUES

## Jobs

Translation

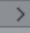

New

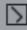

#

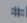

Confirmed

File

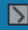

1

0%

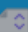

CD003590

## Analyses

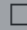

#

Name

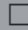

1

Analysis #1

## Analyze

Type Post-editing

Name Analysis #{innerId}

☒ Analyze TM post-editing

☒ Analyze NT post-editing

☒ Analyze MT post-editing

☐ Exclude confirmed segments

☐ Exclude locked segments

☐ Exclude numbers

☐ Analyze by provider

☐ Analyze by language

Count units of the

☒ source

☐ target

Analyze
